# Supplementary material for: Sulindac, a Nonselective NSAID, Reduces Breast Density in Postmenopausal Women with Breast Cancer Treated with Aromatase Inhibitors
Source: Oxford University Press journal article supplement (doi:10.1158/1078-0432.ccr-21-0732), 2021-06-10
Supplement: 10780432ccr210732-sup-261349_2_supp_7127023_qtbrqw.docx [file 10780432ccr210732-sup-261349_2_supp_7127023_qtbrqw.docx]

***Table S2***. Summary statistics for **participant level (between subject)** measurements collagen fiber features at baseline for 32 pre sulindac normal breast tissue specimens.

| **Feature** | **Mean** | **Std Dev** | **CV (%)** | **Min** | **Median** | **IQR** | **Max** | **Skew** |
| --- | --- | --- | --- | --- | --- | --- | --- | --- |
| Fibers (#) |  |  |  |  |  |  |  |  |
| Length (µm) | 13.01 | 0.82 | 6.32 | 11.15 | 12.99 | 0.98 | 14.89 | 0.05 |
| aStraightness | 0.907 | 0.004 | 0.80 | 0.899 | 0.906 | 0.006 | 0.913 | -0.127 |
| Width (µm) | 1.14 | 0.11 | 9.21 | 0.87 | 1.15 | 0.11 | 1.40 | -0.31 |

CV, coefficient of variation.

1Straightness is defined as the ratio of the end-to-end length to the total length of the fiber.
